# Supplementary material for: UPLC–TOF–MS Method for Simultaneous Quantification of Steroid Hormones in Tissue Homogenates of Zebrafish with Solid-Phase Extraction
Source: MDPI journal article supplement (doi:10.3390/molecules26206213), 2021-10-14
Supplement: s1 [file s1]

# UPLC–TOF–MS Method for Simultaneous Quantification of Steroid Hormones in Tissue Homogenates of Zebrafish with Solid-Phase Extraction

Yaxi Li <sup>1,2</sup>, Zhi Yan <sup>1,3</sup>, Xiaodong Li <sup>1</sup>, Xiuli Yin <sup>1</sup> and Ke Li <sup>1,4,\*</sup>

<sup>1</sup> Yantai Institute of Coastal Zone Research, Chinese Academy of Sciences, Yantai 264003, China; yxli@yic.ac.cn (Y.L.); yanzhistudy@s.ytu.edu.cn (Z.Y.); xiaodongli@yic.ac.cn (X.L.); xlyin@yic.ac.cn (X.Y.)

<sup>2</sup> College of Resources and Environment, University of Chinese Academy of Sciences, Beijing 100049, China

<sup>3</sup> School of Ocean, Yantai University, Yantai, 264005, China

<sup>4</sup> Center for Ocean Mega-Science, Chinese Academy of Sciences, Qingdao 266071, China

\* Correspondence: kli@yic.ac.cn; Tel.: +86-535-210-8286

## Table of Content

|                                                                              |   |
|------------------------------------------------------------------------------|---|
| Figure S1. Chromatogram of caffeine refined from dietary supplements .....   | 1 |
| Figure S2. High Resolution mass spectrum of refined caffeine .....           | 2 |
| Figure S3. <sup>1</sup> H NMR spectrum of refined caffeine .....             | 3 |
| Figure S4. <sup>13</sup> C NMR spectrum of refined caffeine .....            | 4 |
| Table S1. Summary of LC-MS method for quantitative analysis of steroids..... | 5 |

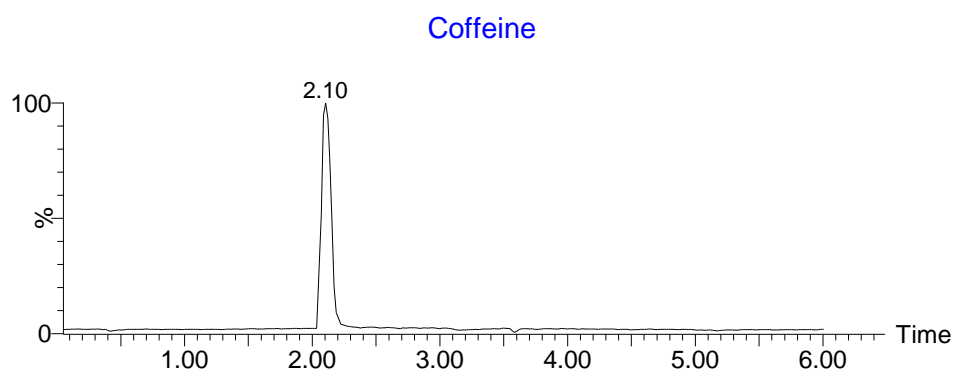

**Figure S1.** Chromatogram of caffeine refined from dietary supplements. The chromatographic separation was performed on Waters ACQUITY H-Class UPLC™ system connected to a Waters Xevo TQ-S triple quadrupole time of flight mass spectrometer (Waters Corp., Milford, MA, USA). The mobile phase consisted of water with FA, 0.1%, as (A) and methanol with FA, 0.1% as (B). A Waters BEH C18 column (2.1 mm×50 mm, 1.7 µm particle size) coupled with an Acquity UPLC™ column in-line filter kit (0.2µm filter) was used. A flow rate of 300 µL/min for 1 min at 18 °C: 95% A for 0.5 min, decreased to 5% A from 0.5 to 4 min, and then maintained at 5% A from 4.00 to 5.00 min, increased to 95% A from 5.0 to 5.01 min, and stayed at 95% A to 6 min for column equilibrium.

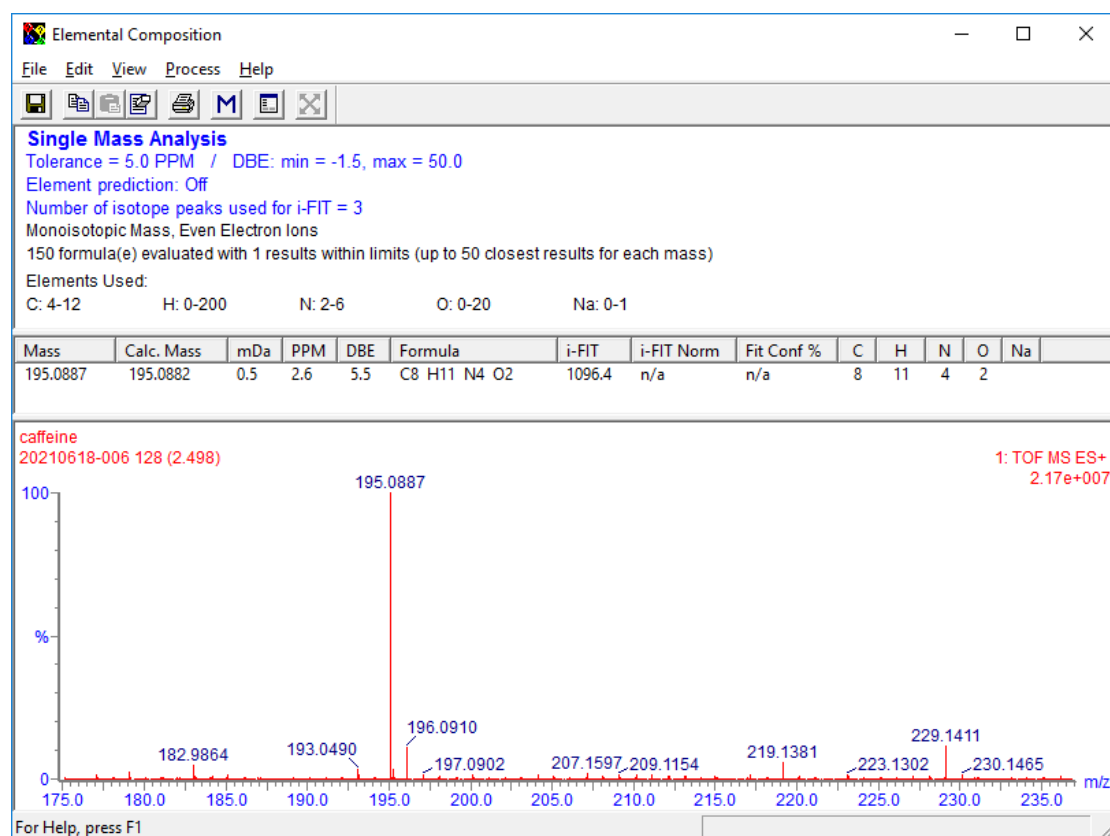

**Figure S2.** High resolution mass spectrum and elemental analysis of caffeine refined from dietary supplements. The refined caffeine was detected by positive mode and processed by Masslynx 4.1 software.

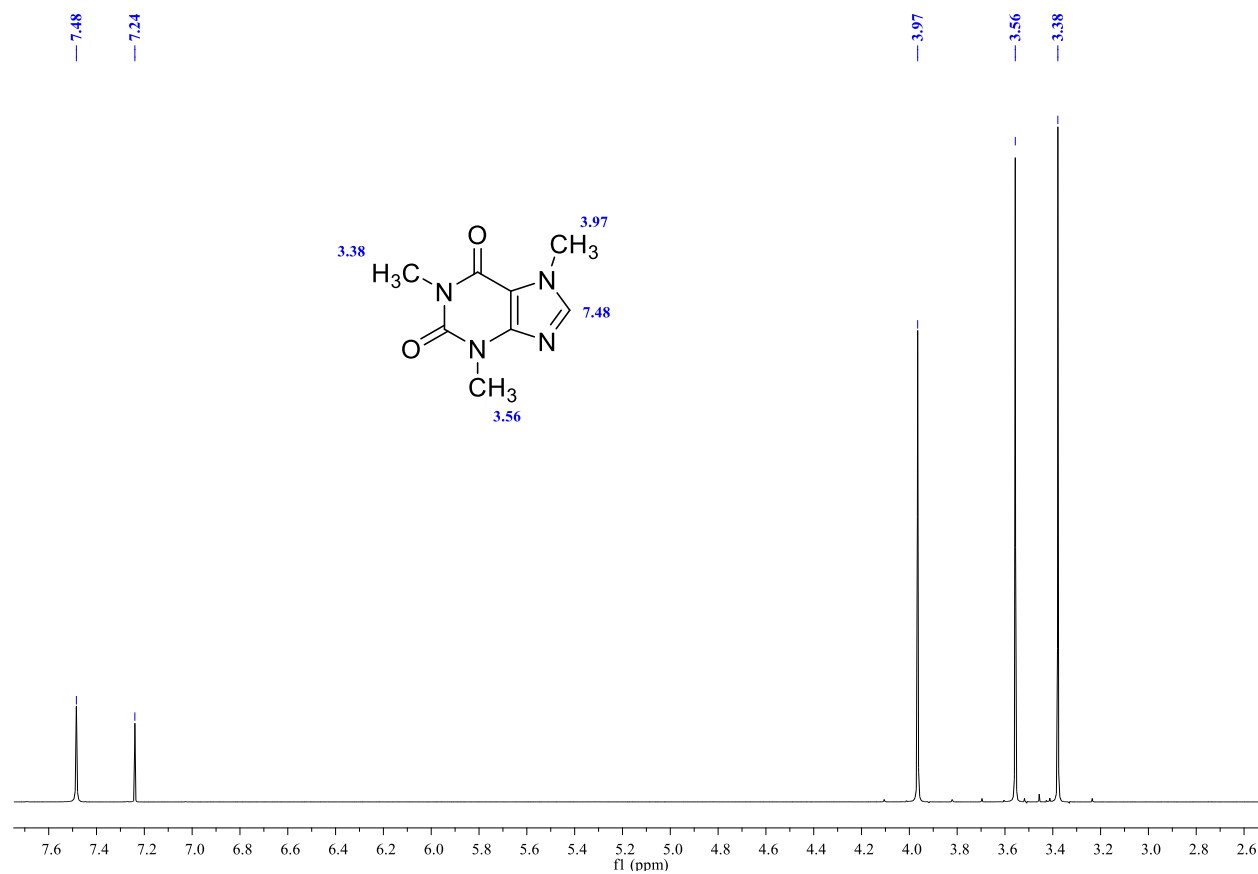

**Figure S3.**  $^1\text{H}$  NMR spectrum of caffeine refined from dietary supplements.

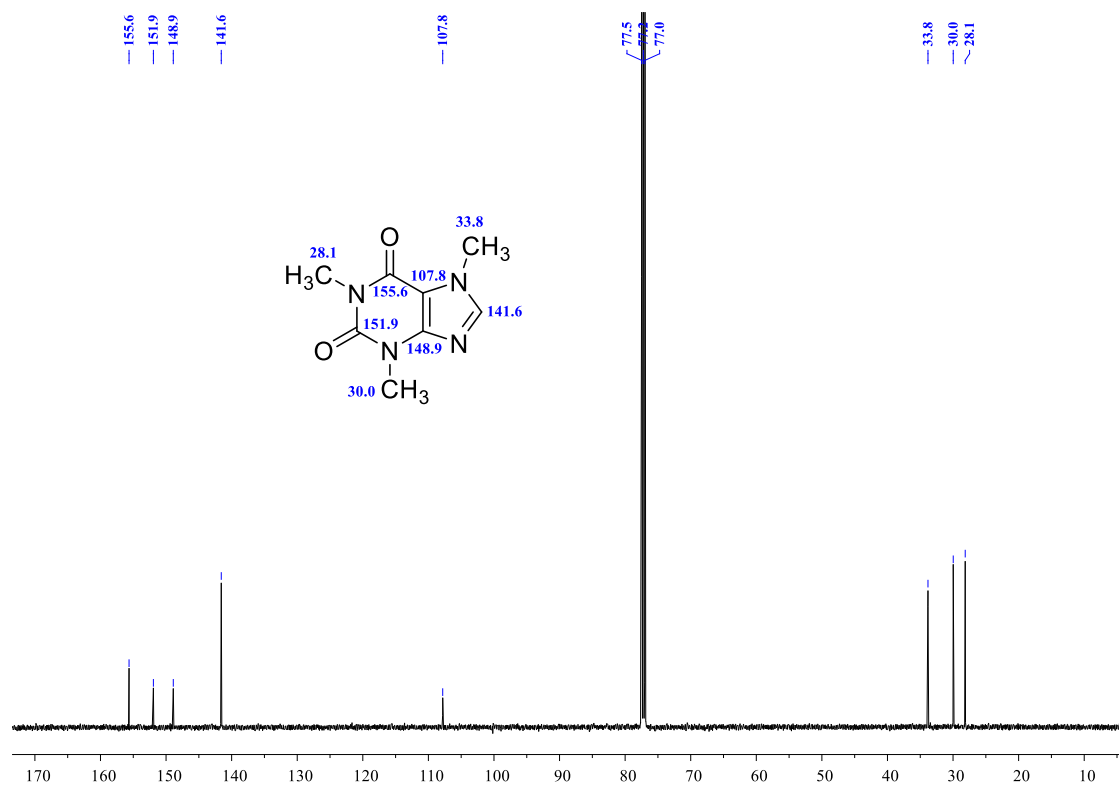

**Figure S4.**  $^{13}\text{C}$  NMR spectrum of caffeine refined from dietary supplements.

**Table S1. Summary of LC-MS method for quantitative analysis of steroids.**

| Analytes     | Sample          | instrument                                                                    | Analytical column                                                            | Sample preparation                     | LOD          | LOQ          | Reference |
|--------------|-----------------|-------------------------------------------------------------------------------|------------------------------------------------------------------------------|----------------------------------------|--------------|--------------|-----------|
| Cortisol     | Human salivary  | Agilent HPLC series 1200-triple quadrupole mass spectrometer agilent 6430     | Zorbax Eclipse XDB-C18 analytical column (4.6 × 50 mm, 1.8 µm particle size) | On-line SPE (Oasis HLB 1mL)            | 0.3 nmol/L;  | 0.55 nmol/L  | [25]      |
| Cortisol     | Human salivary  | Shimadzu UFLC tandem a QTRAP 5500 from AB SCIEX                               | Chromolith SpeedROD column (RP-18, endcapped, 50×4.6 mm) from Merck          | On-line SPE (POROS 30×2.1 mm)          | 0.08 nmol/L; | 0.08 nmol/L; | [26]      |
| Cortisol     | Human salivary  | Agilent 1100 LC- API 4000 MS/MS (ACPI source)                                 | Chromolith column (RP-18e, 100 mm × 4.6 mm)                                  | On-line SPE (Oasis HLB 2.1 mm × 20 mm) | 0.08 nmol/L  | 0.55 nmol/L  | [27]      |
| Cortisol     | Human salivary  | Agilent 1200 HPLC- Agilent 6460 QQQ equipped with a jet stream ESI ion source | a C18 2.1 mm × 50 mm 2.6 µm Kinetex column                                   | liquid–liquid extraction (MTBE)        | 0.27 nmol/L; | None         | [28]      |
| testosterone | Human salivary  | Agilent 1200 HPLC- Agilent 6460 QQQ equipped with a jet stream ESI ion source | a C18 2.1 mm × 50 mm 2.6 µm Kinetex column                                   | liquid–liquid extraction               | 10.81 pmol/L | None         | [28]      |
| Cortisol     | Blood (total)   | Dionex Ultimate 3000 HPLC- Bruker micrOTOF high-resolution mass spectrometry  | Kinetex C8 2.6 µm, 2.1× 100 mm analytical column                             | SPE (Strata-X (60 mg)                  | 9 nmol/L     | 12.5 nmol/L  | [29]      |
| Cortisol     | Whole fish body | Shimadzu UPLC- triple Quadrupole Linear Ion Trap                              | Eclipse plus C18 column, 2.1 × 100 mm, 3.5 µm                                | liquid–liquid extraction               | 0.012 ng/mL  | 0.025 ng/mL  | [30]      |

|                         |                           |                                                                                 |  |  |                                                        |                                                                          |             |                                      |      |
|-------------------------|---------------------------|---------------------------------------------------------------------------------|--|--|--------------------------------------------------------|--------------------------------------------------------------------------|-------------|--------------------------------------|------|
| 17OH-Progesterone       | Whole fish body           | (QTrap 6500, AB sciex)<br>Shimadzu UPLC-<br>Quadrupole Linear Ion Trap          |  |  | Eclipse plus C18<br>column, 2.1 × 100 mm, 3.5 μm       | (MTBE)<br>liquid–liquid<br>extraction                                    | 0.012 ng/mL | 0.012 ng/mL                          | [30] |
| testosterone            | Human serum               | (QTrap 6500, AB sciex)<br>Acquity 2D-UPLC<br>Xevo TQ-S tandem mass spectrometer |  |  | Kinetex Fluorophenyl-column<br>(1.7 μm (2.1 × 100 mm)) | 2D-UPLC system<br>with a BEH 300<br>C4-column<br>(1.7μm, 2.1 × 50<br>mm) | None        | 0.05-0.30<br>ng/mL (nine<br>methods) | [31] |
| androstenedione         | Human serum               | Acquity 2D-UPLC<br>Xevo TQ-S tandem mass spectrometer                           |  |  | Kinetex Fluorophenyl-column<br>(1.7 μm (2.1 × 100 mm)) | 2D-UPLC system<br>with a BEH 300<br>C4-column<br>(1.7μm, 2.1 × 50<br>mm) | None        | 0.05-0.35<br>(nine<br>methods)       | [31] |
| 11-deoxycortisol        | Human serum<br>and plasma | HPLC-AB Sciex<br>spectrometer                                                   |  |  | Kinetex C18, 50 ×<br>3 mm, 2.6 μm                      | liquid–liquid<br>extraction<br>(MTBE)                                    | 0.16 nmol/L | 0.30 nmol/L                          | [32] |
| 11-deoxycorticosterone  | Human serum<br>and plasma | HPLC-AB Sciex<br>spectrometer                                                   |  |  | Kinetex C18, 50 ×<br>3 mm, 2.6 μm                      | liquid–liquid<br>extraction<br>(MTBE)                                    | 0.03 nmol/L | 0.06 nmol/L                          | [32] |
| 17-hydroxy progesterone | Human serum<br>and plasma | HPLC-AB Sciex<br>spectrometer                                                   |  |  | Kinetex C18, 50 ×<br>3 mm, 2.6 μm                      | liquid–liquid<br>extraction<br>(MTBE)                                    | 0.08 nmol/L | 0.19 nmol/L                          | [32] |
